# Supplementary material
Source: PubMed Central journal article supplement (PMC7420159)
Supplement: jama-324-560-s003.pdf [file jama-324-560-s003.pdf]

Franz AR, Engel C, Bassler D, et al; ETTNO Investigators. Effects of liberal vs restrictive transfusion thresholds on survival and neurocognitive outcomes in extremely low-birth-weight infants: the ETTNO randomized clinical trial. Published August 11, 2020. doi:10.1001/jama.2020.10690

## **Data Sharing Statement**

### **Data**

**Data available:** No

### **Additional Information**

**Explanation for why data not available:** Parental consent was not asked for data sharing.
